# Supplementary material
Source: publisher figshare collection journal article supplement (https://acs.figshare.com/ndownloader/files/4797433)
Supplement: Supplementary file 1 [file 4797433]

## Supporting Information

### **Exploration of Energy Modulations in Novel RhB-TPE-Based Bichromophoric Materials via Interactions of Cu<sup>2+</sup> ion under Various Semiaqueous and Micellar Conditions**

*Ravinder Singh, Atul Kumar Dwivedi, Ashutosh Singh, Chien-Min Lin, Reguram Arumugaperumal, Kung-Hwa Wei, and Hong-Cheu Lin\**

Department of Materials Science & Engineering, National Chiao Tung University, Hsinchu, Taiwan

\*Email: [linhc@mail.nctu.edu.tw](mailto:linhc@mail.nctu.edu.tw)

**List of contents:**

|                                                                          |       |                          |
|--------------------------------------------------------------------------|-------|--------------------------|
| <b>1. Synthesis section</b>                                              | ----- | <b>page S-3 to S-6</b>   |
| <b>2. Figures S1 &amp; S2</b>                                            | ----- | <b>page S-6</b>          |
| <b>3. Figures S3 &amp; S4</b>                                            | ----- | <b>page S-7</b>          |
| <b>4. Figures S5 &amp; S6</b>                                            | ----- | <b>page S-8</b>          |
| <b>5. Figure S7</b>                                                      | ----- | <b>page S-9</b>          |
| <b>6. Figures S8 &amp; S9</b>                                            | ----- | <b>page S-10</b>         |
| <b>6. Figures S10 &amp; S11</b>                                          | ----- | <b>page S-11</b>         |
| <b>7. Figures S12 &amp; S13</b>                                          | ----- | <b>page S-12</b>         |
| <b>8. Figures S14 &amp; S15</b>                                          | ----- | <b>page S-13</b>         |
| <b>9. Figures S16 &amp; S17</b>                                          | ----- | <b>page S-14 to S-15</b> |
| <b>10. NMR (<sup>1</sup>H &amp; <sup>13</sup>C) (Figures S18 to S23)</b> | ----- | <b>page S-16 to S-21</b> |
| <b>11. EA data Figure S24</b>                                            | ----- | <b>page S-22</b>         |
| <b>12. HRMS (ESI data) (Figures S25 &amp; S26)</b>                       | ----- | <b>page S-23 to S-24</b> |
| <b>13. Mass spectra (Figures S27 &amp; S28)</b>                          | ----- | <b>page S-25 to S-26</b> |

## SYNTHESIS SECTION:

**Synthesis of 4-(1,2,2-triphenylvinyl) phenol (1):** Synthesis of **1** was performed by following the reported methods in the literature.<sup>32</sup>

**Synthesis of 1,2-bis (4-hydroxyphenyl)-1,2-diphenylethene (2):** Synthesis of **2** was performed by following the reported methods in the literature.<sup>33</sup>

**General synthetic procedure for intermediates 3 and 5:** The prepared compound 4-(1,2,2-triphenylvinyl)phenol (**1**), 1,2-bis(4-hydroxyphenyl)-1,2-diphenylethene (**2**) were charged into a cleaned dry 100 mL three necked round bottom flask followed by the addition of Acetone (20 mL) at room temperature under nitrogen gas atmosphere. K<sub>2</sub>CO<sub>3</sub> was then added into the reaction mixture in one portion at room temperature and allowed to stir for 10-15 min. After that, 1,3-dibromopropane was added dropwise into above reaction mixture at room temperature. Furthermore, resulting solution was refluxed at 60°C for overnight. Progress of reaction was monitored by TLC. After completion, reaction mixture was cooled to room temperature and directly evaporated to dryness under vacuum to get crude compound. Crude residue was then purified by using column chromatography over silica gel (2% ethyl acetate/ hexane) as eluent. Colorless liquids affording pure compounds were obtained.

**Synthesis of (2-(4-(3-bromopropoxy) phenyl)ethene-1,1,2-triyl)tribenzene (3):** 4-(1,2,2-triphenylvinyl)phenol (**1**) (1 g, 1 eq.), Acetone (20 mL), K<sub>2</sub>CO<sub>3</sub> (0.99 g, 2.5 eq.), 1,3-dibromopropane (1.17 mL, 4 eq.). A colorless liquid affording (**3**) (1.21 g) was obtained in a 90% yield.

$^1\text{H}$  NMR (300 MHz, DMSO- $d_6$ )  $\delta$  (ppm): 7.08-7.14 (9H, m), 6.92-6.98 (6H, m), 6.85 (2H, d,  $J$  = 9.0 Hz), 6.69 (2H, d,  $J$  = 9.0 Hz), 3.97 (2H, t,  $J$  = 6.0 Hz, oxygen  $\alpha$ -proton), 3.62 (2H, t,  $J$  = 6.0 Hz), 2.17 (2H, q,  $J$  = 6.0 Hz, Br  $\alpha$ -proton).

$^{13}\text{C}$  NMR (300 MHz, DMSO- $d_6$ )  $\delta$  (ppm): 157.7, 144.3, 141.0, 140.5, 136.4, 132.8, 131.5, 128.7, 127.2, 114.6, 65.9, 32.7, 32.1.

**Synthesis of 1,2-bis(4-(3-bromopropoxy)phenyl)-1,2-diphenylethene (5):** 1,2-bis(4-hydroxyphenyl)-1,2-diphenylethene (**2**) (1 g, 1 eq.), Acetone (20 mL),  $\text{K}_2\text{CO}_3$  (1.89 g, 5 eq.), 1,3-dibromopropane (2.23 mL, 8eq.). A colorless liquid affording (**5**) (1.49 g) was obtained in a 90% yield.

$^1\text{H}$  NMR (300 MHz, DMSO- $d_6$ )  $\delta$  (ppm): 7.08-7.14 (6H, m), 6.92-6.99 (4H, m), 6.82-6.88 (4H, m), 6.67-6.74 (4H, m), 3.99 (4H, t,  $J$  = 6.0 Hz, oxygen  $\alpha$ -proton), 3.63 (4H, t,  $J$  = 6.0 Hz), 2.20 (4H, q,  $J$  = 6.0 Hz, Br  $\alpha$ -proton).

$^{13}\text{C}$  NMR (300 MHz, DMSO- $d_6$ )  $\delta$  (ppm): 156.7, 143.6, 139.2, 135.8, 131.9, 130.7, 127.6, 126.2, 113.4, 66.9, 65.0, 31.8, 31.2, 25.0.

**General synthetic procedure for intermediates 4 and 6:**

Prepared compound (2-(4-(3-bromopropoxy)phenyl)ethene-1,1,2-triyl)tribenzene (**3**), 1,2-bis(4-(3-bromopropoxy)phenyl)-1,2-diphenylethene (**5**) were added into a cleaned dry 100 mL three necked round bottom flask at room temperature followed by the addition of dry DMF (40 mL) under nitrogen gas atmosphere.  $\text{NaN}_3$  was added into the reaction mixture of intermediates (**3**) and (**5**) and allowed to reflux at 60°C for 10 h. Progresses of reactions were monitored by TLC.

After completion, reaction mixtures were cooled to room temperature. Reaction mixtures were then poured into a beaker containing diethyl ether (200 mL) and H<sub>2</sub>O (200 mL). Organic layer was separated and washed with H<sub>2</sub>O (200 mL x 2) and brine solution (200 mL x 2) and dried over MgSO<sub>4</sub>, filtered and evaporated to dryness. Crude residues were subjected to column chromatography (silica gel, hexane/ethyl acetate: 9/1 to 6/4). Colorless liquids of desired intermediates (**4**) and (**6**) were recovered.

**Synthesis of ((2-(4-(3-azidopropoxy)phenyl)ethene-1,1,2-triyl)tribenzene) (4):** (2-(4-(3-bromopropoxy) phenyl) ethene-1,1,2-triyl) tribenzene (**3**) (1 g, 1 eq.), DMF (40 mL), NaN<sub>3</sub> (0.41 g, 3 eq.). A colorless liquid (**4**) was recovered (0.83 g) in a 91% yield.

<sup>1</sup>H NMR (300 MHz, DMSO-*d*<sub>6</sub>) δ (ppm): 7.08-7.14 (9H, m), 6.94-6.98 (6H, m), 6.84 (2H, d, *J* = 9.0 Hz), 6.68 (2H, d, *J* = 9.0 Hz), 3.92 (2H, t, *J* = 6.0 Hz, oxygen α-proton), 3.46 (2H, t, *J* = 6.0 Hz), 1.92 (2H, q, *J* = 6.0 Hz, Br α-proton).

<sup>13</sup>C NMR (300 MHz, DMSO-*d*<sub>6</sub>) δ (ppm): 157.9, 144.4, 141.2, 140.7, 136.5, 132.9, 131.7, 128.8, 127.4, 114.7, 68.0, 65.4, 48.7, 29.1, 26.1.

**Synthesis of (1,2-bis(4-(3-azidopropoxy)phenyl)-1,2-diphenylethene) (6):** 1,2-bis(4-(3-bromopropoxy)phenyl)-1,2-diphenylethene (**5**) (1 g, 1 eq.), DMF (40 mL), NaN<sub>3</sub> (0.32 g, 3 eq.). A colorless liquid (**6**) was recovered (0.79 g) in a 91% yield.

<sup>1</sup>H NMR (300 MHz, DMSO-*d*<sub>6</sub>) δ (ppm): 7.07-7.15 (6H, m), 6.98 (4H, m), 6.88-6.93 (4H, m), 6.67-6.70 (4H, m), 3.95 (4H, t, *J* = 6.0 Hz, oxygen α-proton), 3.48 (4H, t, *J* = 9.0 Hz), 1.93 (4H, q, *J* = 6.0 Hz, Br α-proton).

$^{13}\text{C}$  NMR (300 MHz,  $\text{DMSO-}d_6$ )  $\delta$  (ppm): 157.2, 144.2, 139.7, 136.2, 132.4, 131.2, 128.2, 126.7, 114.2, 64.8, 48.1, 28.5.

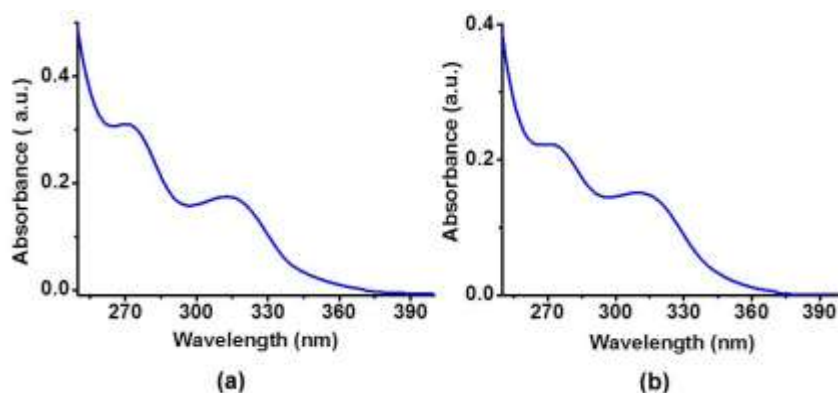

**Figure S1.** (a) UV-Vis spectra of **TR-A** (4  $\mu\text{M}$ ) (b) UV-Vis spectra of **TR-B** (4  $\mu\text{M}$ ) in  $\text{CH}_3\text{CN}$  solvent medium.

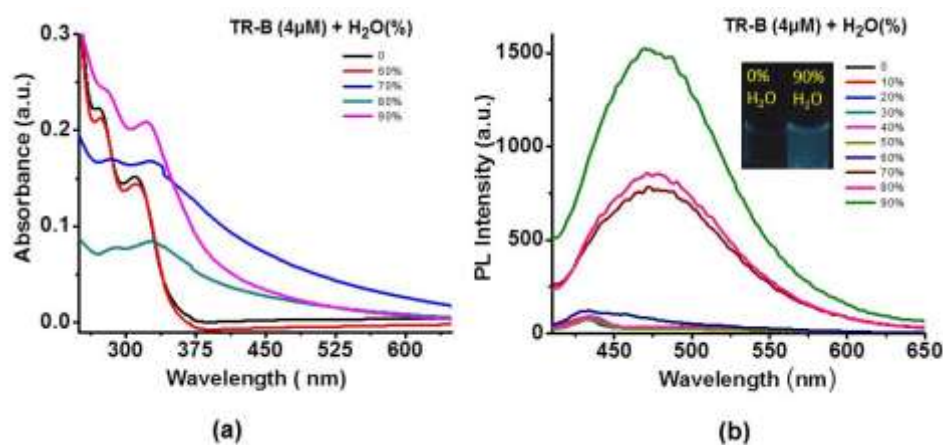

**Figure S2.** (a) UV-Vis spectra of **TR-B** with increasing water fractions: 0, 50, 60, 70, 80, and 90%. (b) PL spectra of **TR-B** with increasing water fractions: 0, 10, 20, 30, 40, 50, 60, 70, 80, and 90%, Inset: photoimages of **TR-B** under UV lamp in the absence and presence (90%) of water. with an excitation wavelength at  $\lambda_{\text{ex}} = 380$  nm.

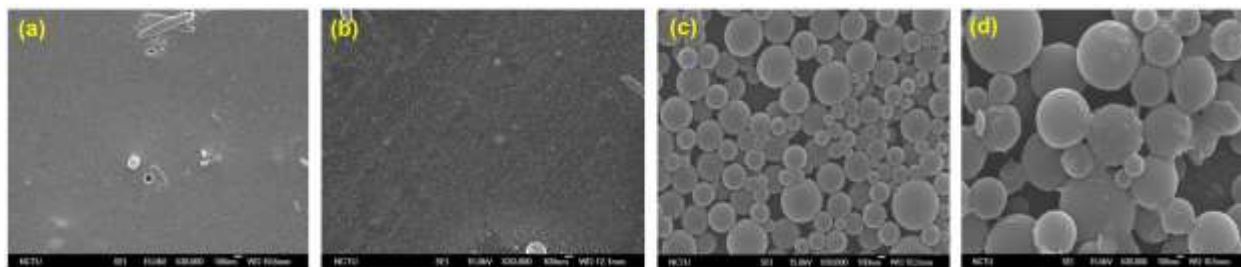

**Figure S3.** Morphological images of (a) **TR-B** in  $\text{CH}_3\text{CN}$  (b) **TR-B** at 60% water content (c) **TR-B** at 70% water content (d) **TR-B** at 90% water content.

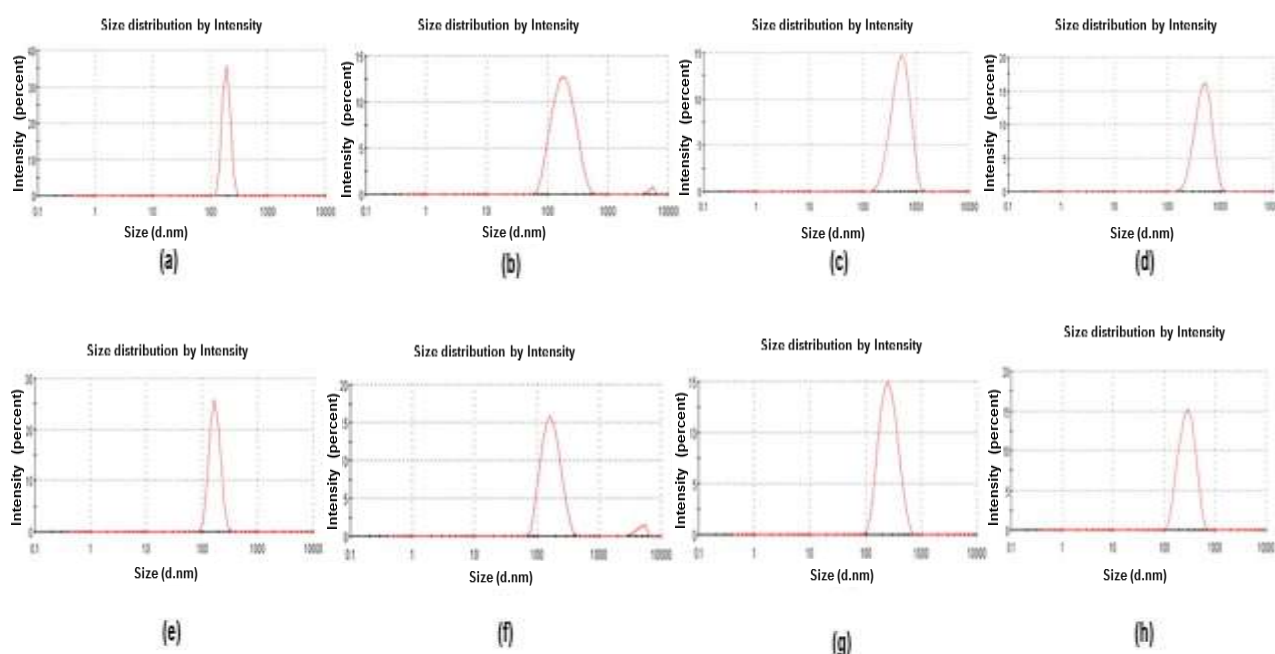

**Figure S4.** Measured DLS (a) **TR-A** in  $\text{CH}_3\text{CN}$  (mean size 189.8 nm). (b) **TR-A** at 50% water content (mean size of 200.4 nm). (c) **TR-A** at 60% water content (mean size 500.5 nm). (d) **TR-A** at 80% water content (mean size 541.8 nm). (e) **TR-B** in  $\text{CH}_3\text{CN}$  (mean size 173.1 nm). (f) **TR-B** at 60% water content (mean size 181.2 nm). (g) **TR-B** at 70% water content (mean size 273.1 nm). (h) **TR-B** at 90% water content (mean size 293.8 nm).

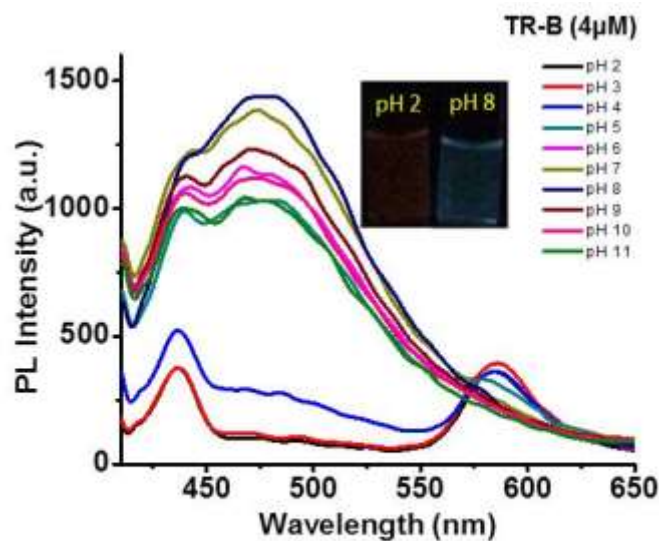

(a)

**Figure S5.** (a) Alterations in PL spectra of **TR-B** with different pH conditions from 2 to 11. Inset: photoimages of **TR-A** under UV lamp in acidic (pH = 2) and basic (pH = 8) conditions, with an excitation wavelength at  $\lambda_{\text{ex}} = 380$  nm.

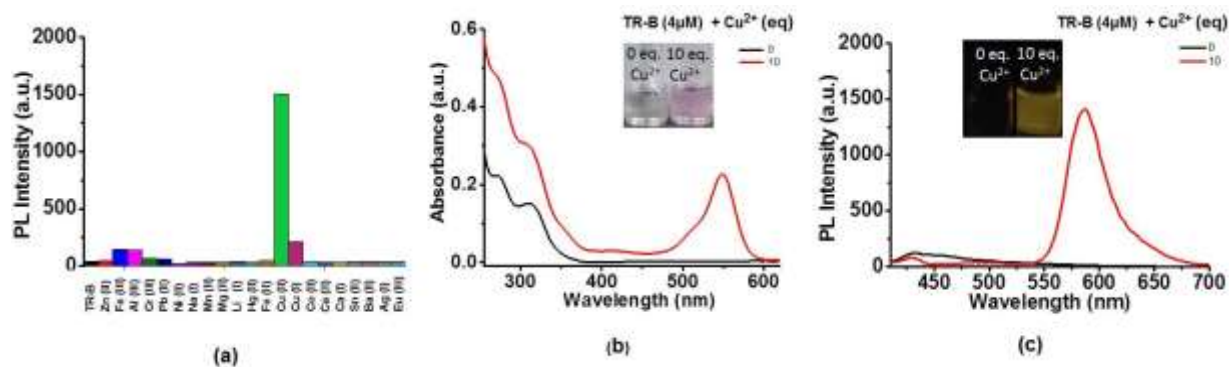

**Figure S6.** (a) Bar diagrams depicting PL intensity enhancement from RhB in **TR-B** with interactions of various metal ions. (b) UV-Vis spectral changes of **TR-B** in CH<sub>3</sub>CN solution observed pink color as a result of interaction with Cu<sup>2+</sup> metal ion. (c) PL spectral changes of **TR-B** in CH<sub>3</sub>CN with the interaction of Cu<sup>2+</sup> metal ion, Inset: photoimages of **TR-B** in the absence and presence of Cu<sup>2+</sup> metal ion, with an excitation wavelength at  $\lambda_{\text{ex}} = 380$  nm.



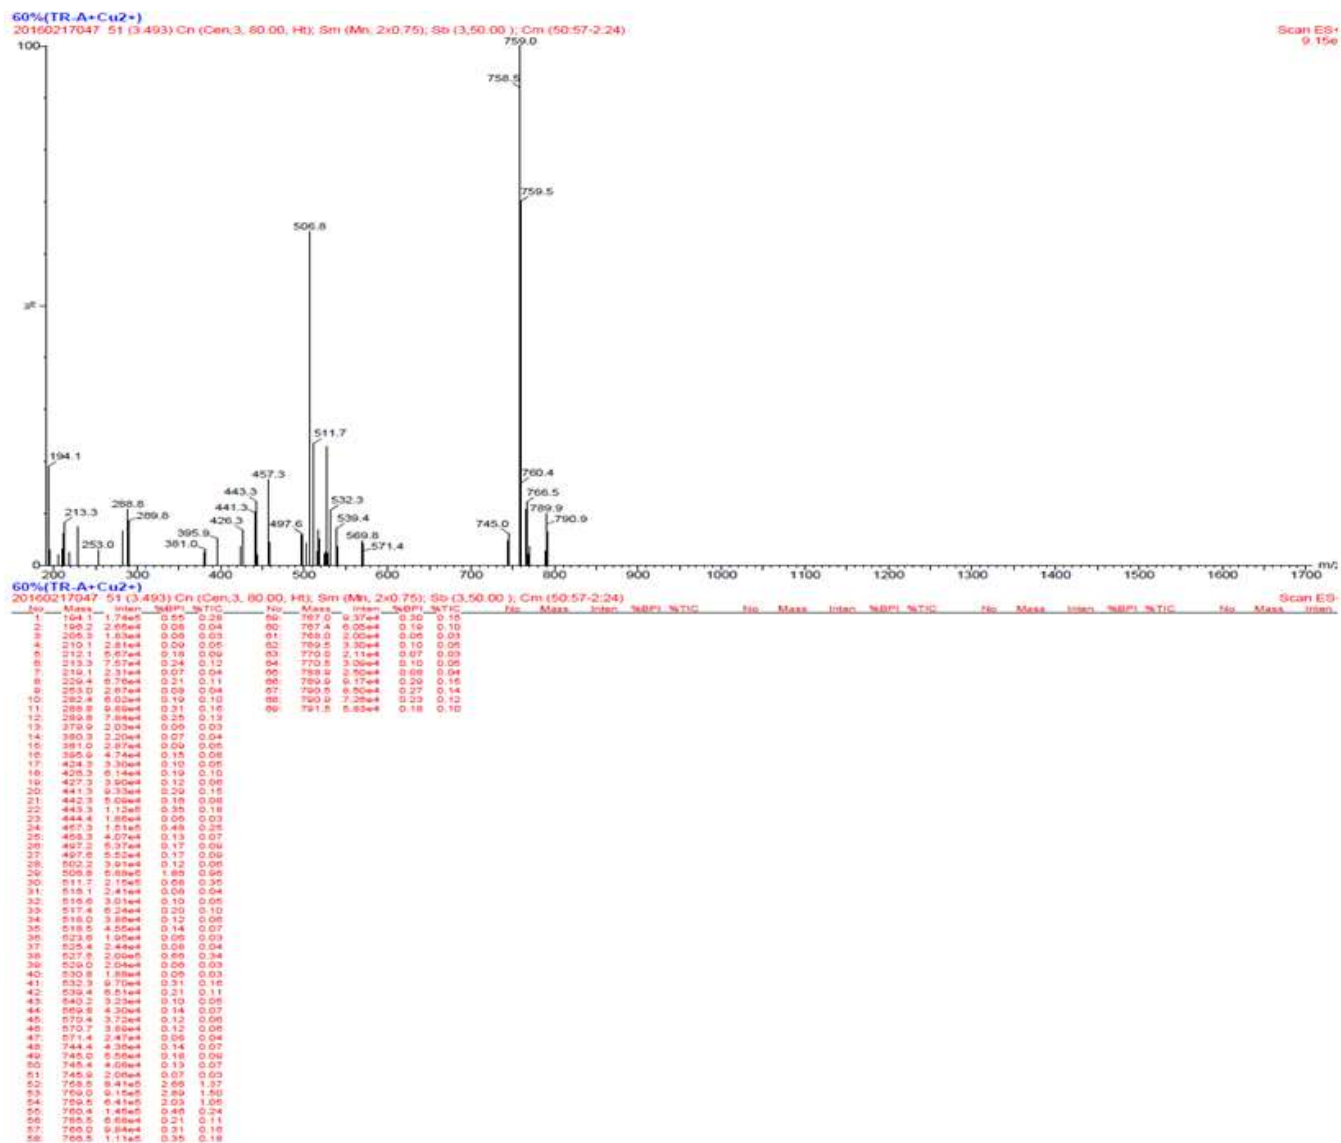

**Figure S7.** Mass spectrum of **TR-A** at 60% water content in the presence of  $\text{Cu}^{2+}$  metal ion.

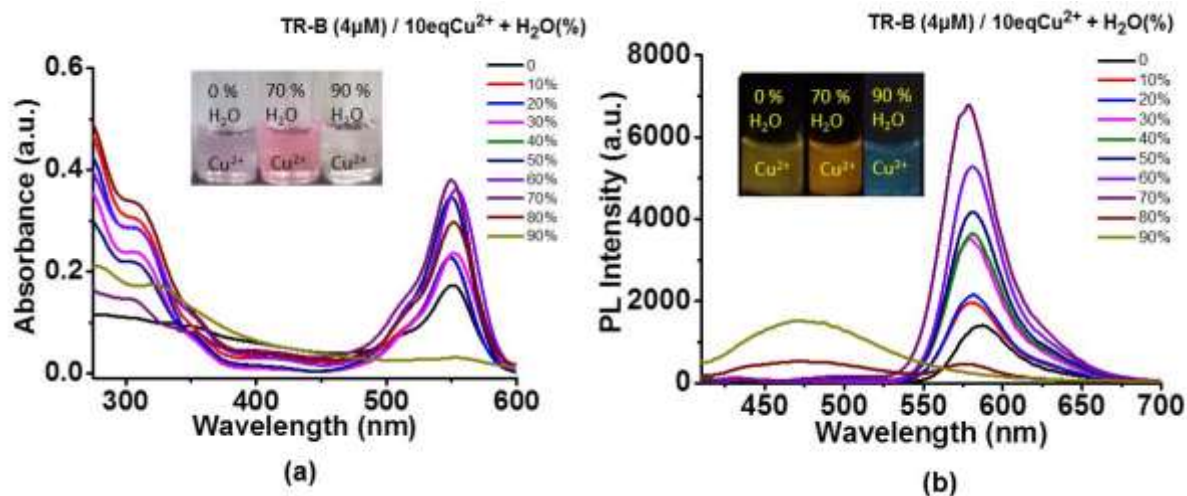

**Figure S8.** Upon the addition of Cu<sup>2+</sup> (10 eq.) (a) UV-vis spectral changes (b) PL spectral changes of **TR-B** by increasing water fractions: 0, 10, 20, 30, 40, 50, 60, 70, and 80%, Insets: photoimages of **TR-B** in the presence of Cu<sup>2+</sup> (at various water contents of 0, 70, and 90%) by naked eye observations and PL emissions, respectively, with a PL excitation wavelength at  $\lambda_{\text{ex}} = 380$  nm.

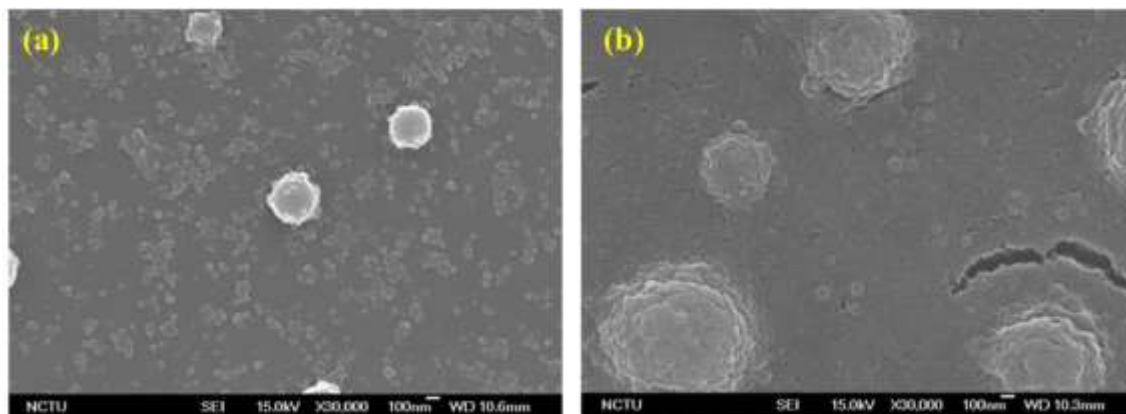

**Figure S9.** Morphological images of (a) **TR-A** at 50% water content in the presence of Cu<sup>2+</sup> (10eq.) (b) **TR-A** at 60% water content in the presence of Cu<sup>2+</sup> (10eq.).

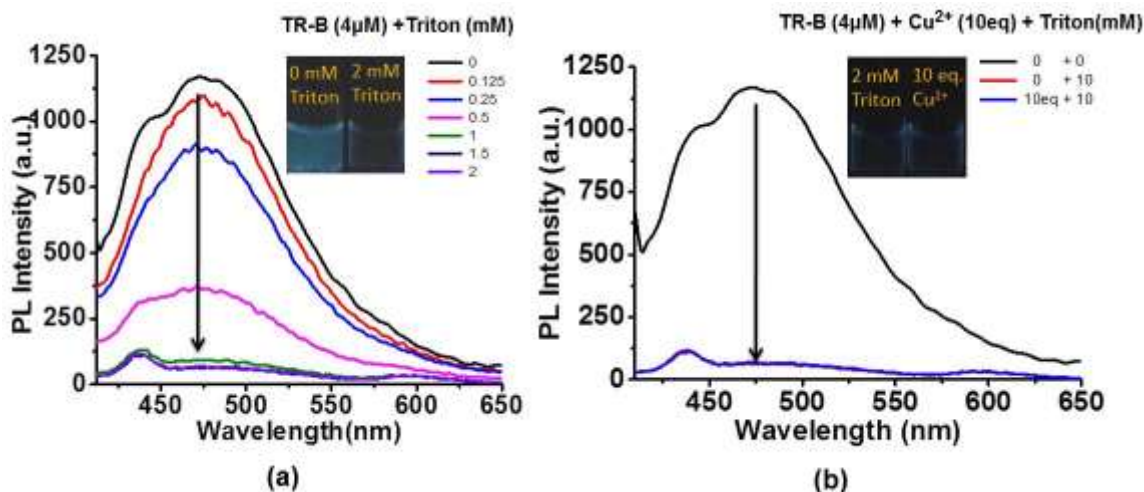

**Figure S10.** (a) PL spectra of **TR-B** at 90% water content in various triton-X-100 concentrations without  $\text{Cu}^{2+}$ . (b) PL spectra of **TR-B** at 90% water content in various triton-X-100 concentrations with  $\text{Cu}^{2+}$ , with a PL excitation wavelength at  $\lambda_{\text{ex}} = 380$  nm.

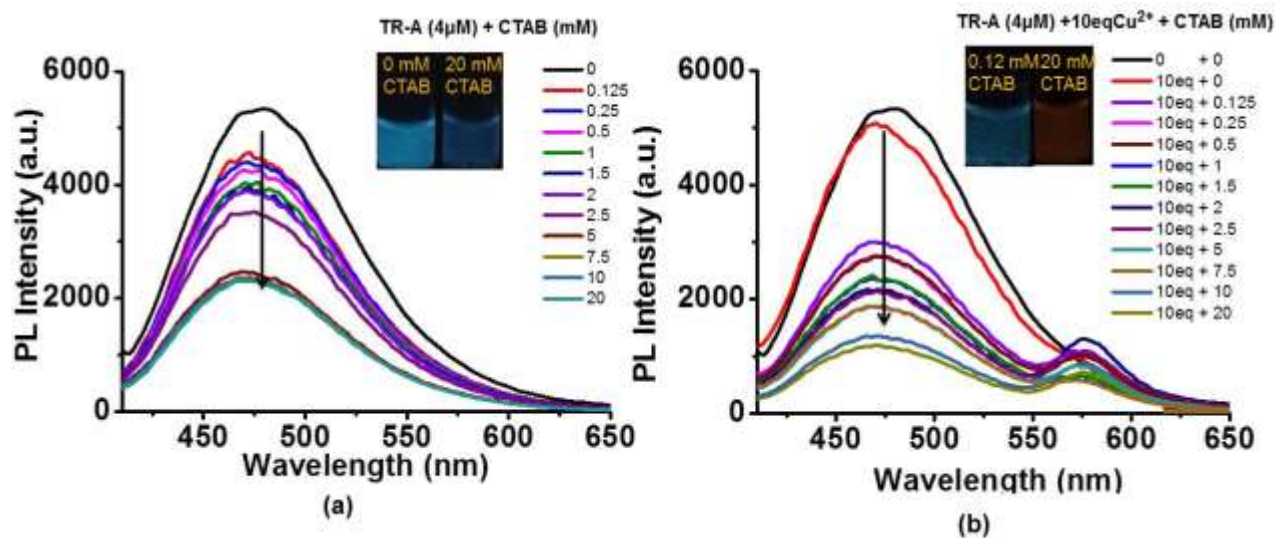

**Figure S11.** (a) PL spectra of **TR-A** at 80% water content in various CTAB concentrations without  $\text{Cu}^{2+}$ . (b) PL spectra of **TR-A** at 80% water content in various CTAB concentrations with  $\text{Cu}^{2+}$ , with a PL excitation wavelength at  $\lambda_{\text{ex}} = 380$  nm.

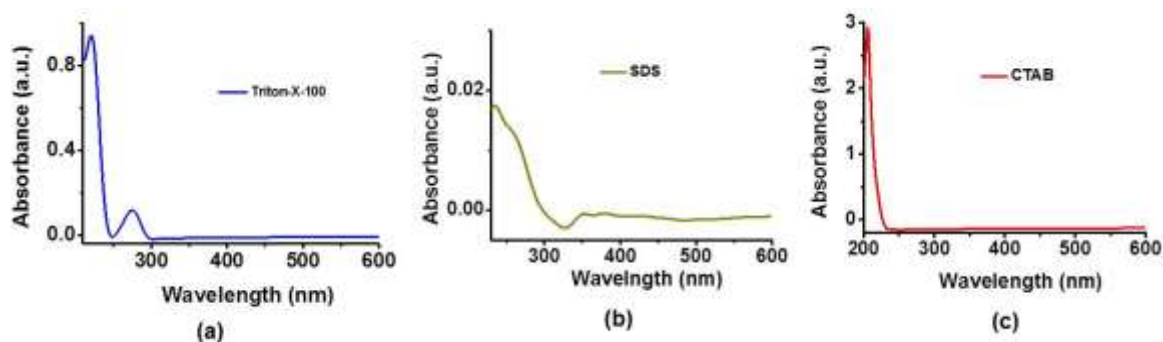

**Figure S12.** UV spectra of (a) Triton-X-100 at 80% water content (b) SDS at 80% water content (c) CTAB at 80% water content.

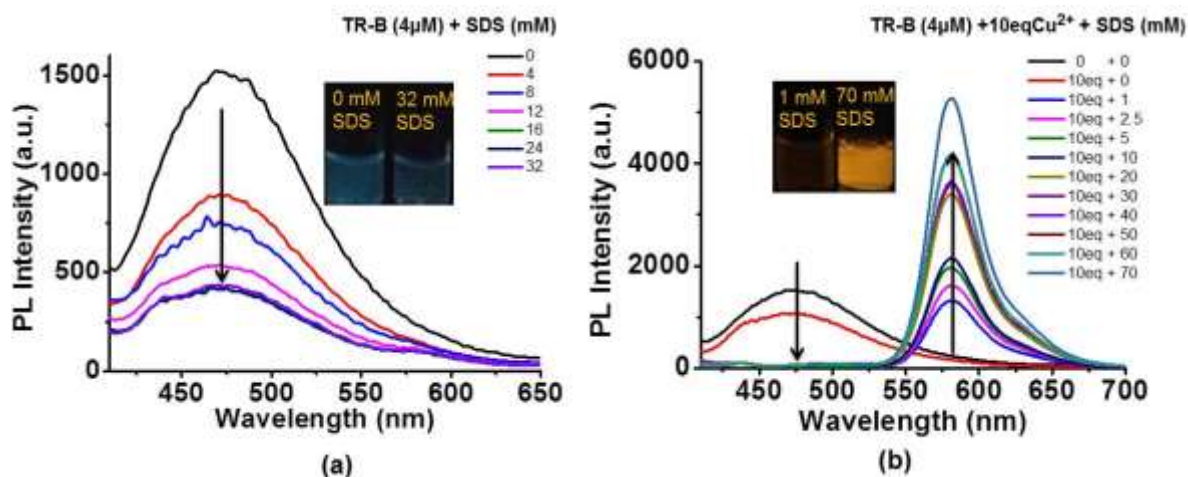

**Figure S13.** (a) PL spectra of **TR-B** at 90% water content in various SDS concentrations without  $\text{Cu}^{2+}$ . (b) PL spectra of **TR-B** at 90% water content in various SDS concentrations with  $\text{Cu}^{2+}$ , with a PL excitation wavelength at  $\lambda_{\text{ex}} = 380$  nm.

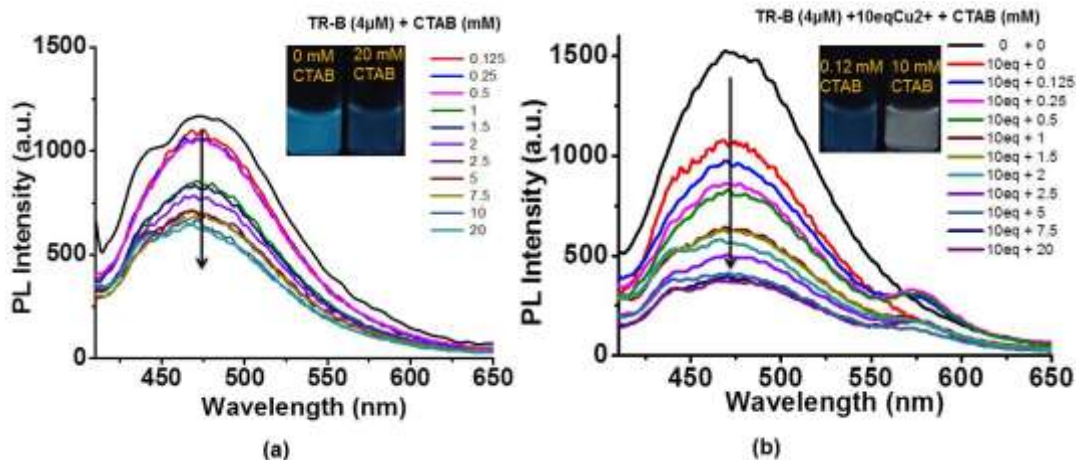

**Figure S14.** (a) PL spectra of **TR-B** at 90% water content in various CTAB concentrations without Cu<sup>2+</sup>. (b) PL spectra of **TR-B** at 90% water content in various CTAB concentrations with Cu<sup>2+</sup>, with a PL excitation wavelength at  $\lambda_{\text{ex}} = 380$  nm.

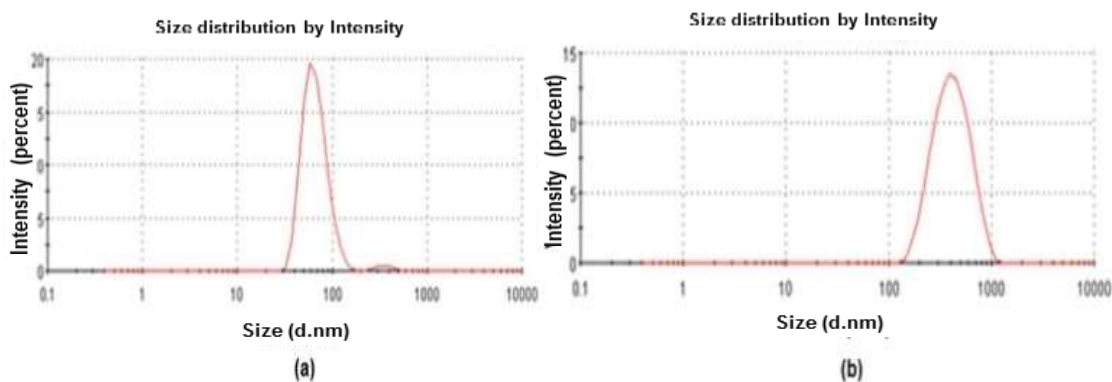

**Figure 15.** DLS spectra of (a) Triton-X-100 micelles at 80% water content (a mean size of 67.3 nm) (b) Triton-X-100 micelles at 80% water content in the presence of **TR-A** (a mean size of 435.5 nm).

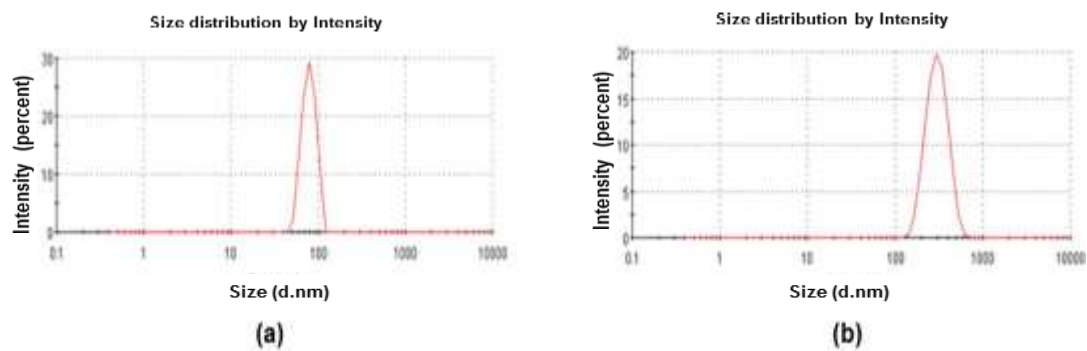

**Figure S16.** Measured DLS (a) Triton-X-100 micelles at 90% water content (mean size of 79.2 nm). (b) TriX100 micelles at 90% water content in the presence of **TR-B** (mean size of 309.1nm).



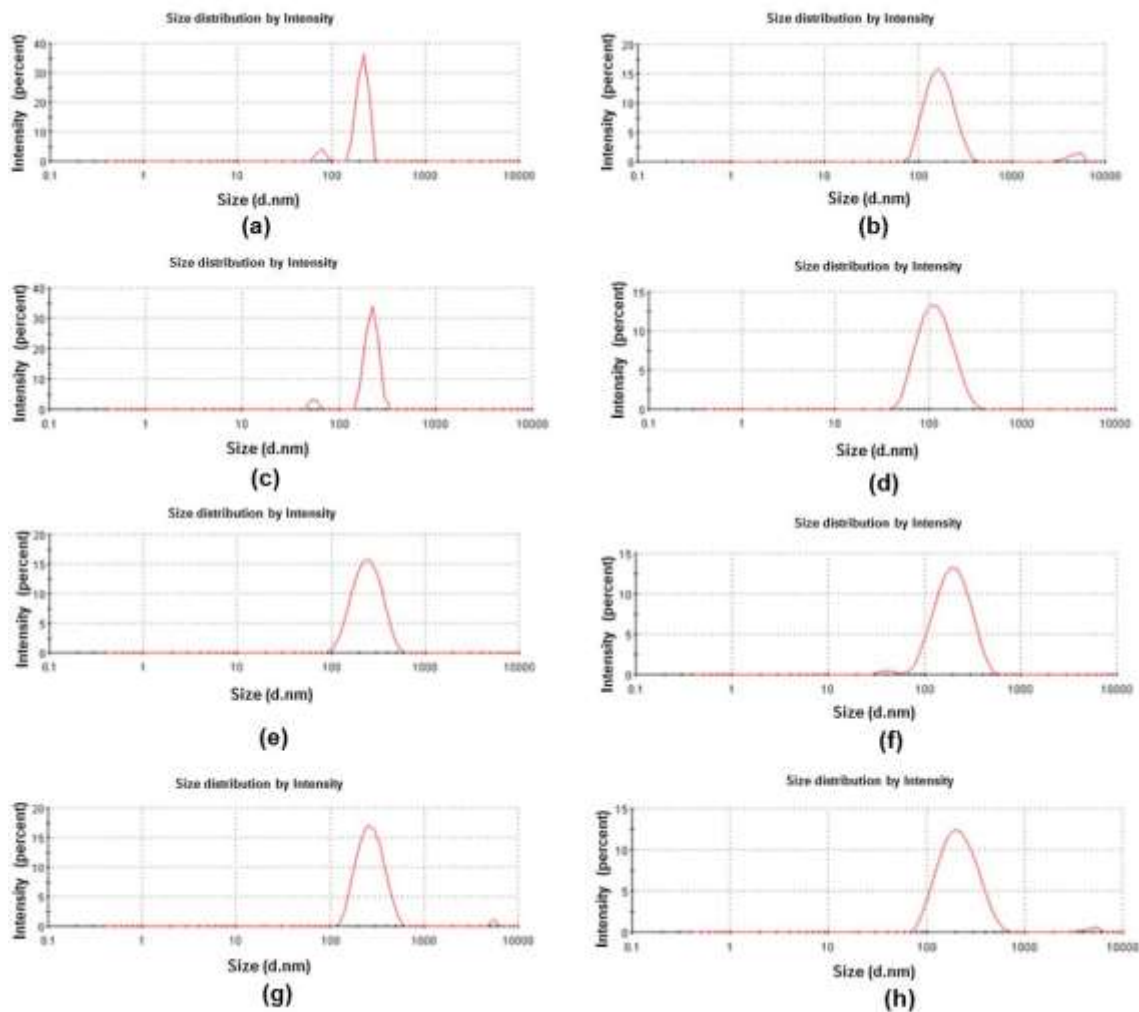

**Figure S17.** Measured DLS (a) SDS micelles at 80% water content (mean size of 216.1 nm). (b) SDS micelles at 80% water content in the presence of **TR-A** (mean size of 176.4 nm). (c) SDS micelles at 90% water content (mean size of 220.1 nm). (d) SDS micelles at 90% water content in the presence of **TR-B** (mean size of 126.3 nm). (e) CTAB micelles at 80% water content (mean size of 252.5 nm). (f) CTAB micelles at 80% water content in presence of **TR-A** (mean size of 211.2 nm). (g) CTAB micelles at 90% water content (mean size of 278.2 nm). (h) CTAB micelles at 90% water content in the presence of **TR-B** (mean size of 228.6 nm).

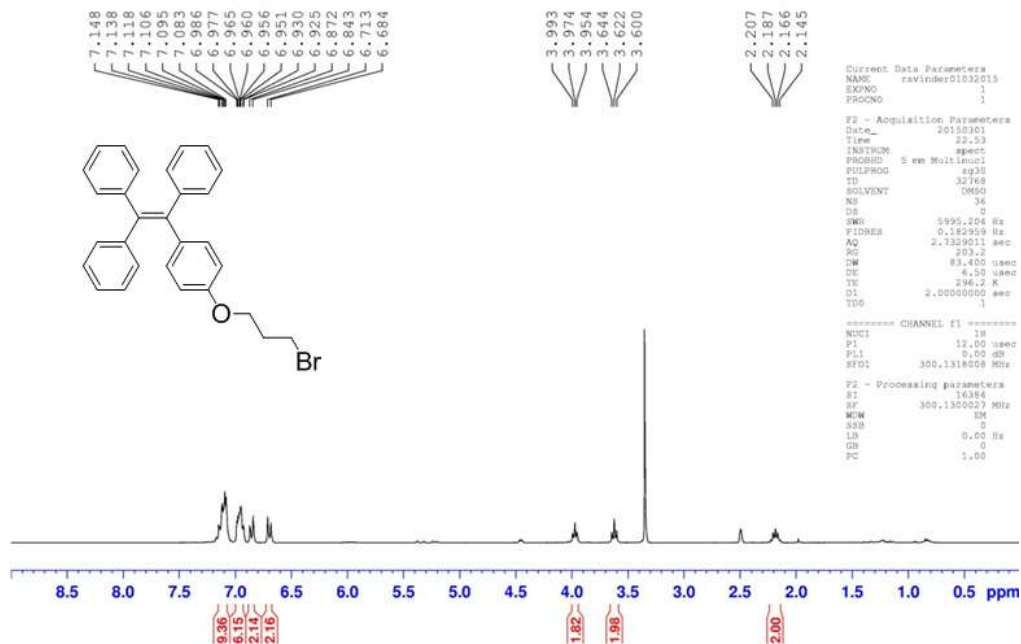

Figure S18. 1. <sup>1</sup>H NMR of intermediate (3).

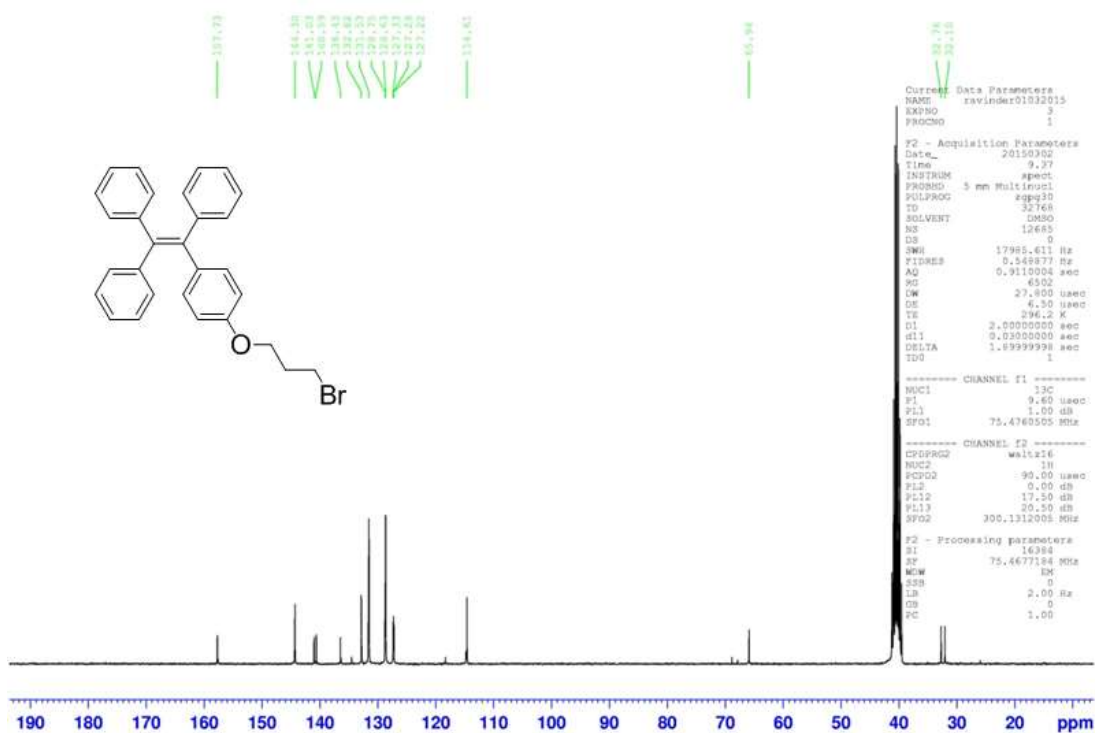

Figure S18.2. <sup>13</sup>C NMR of intermediate (3).



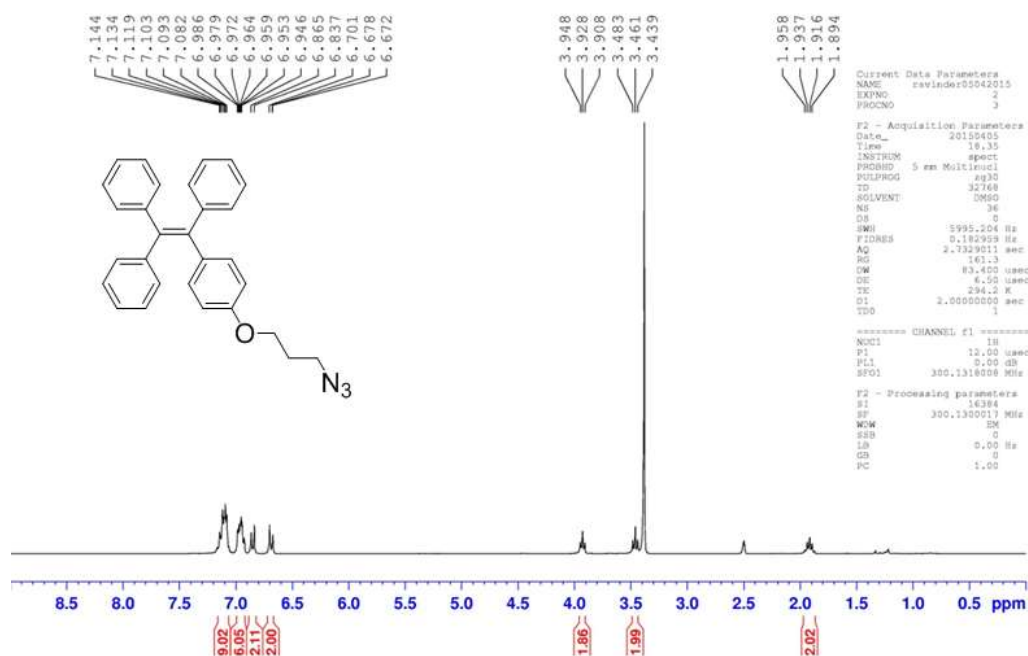

Figure S19.1. <sup>1</sup>H NMR of intermediate (4).

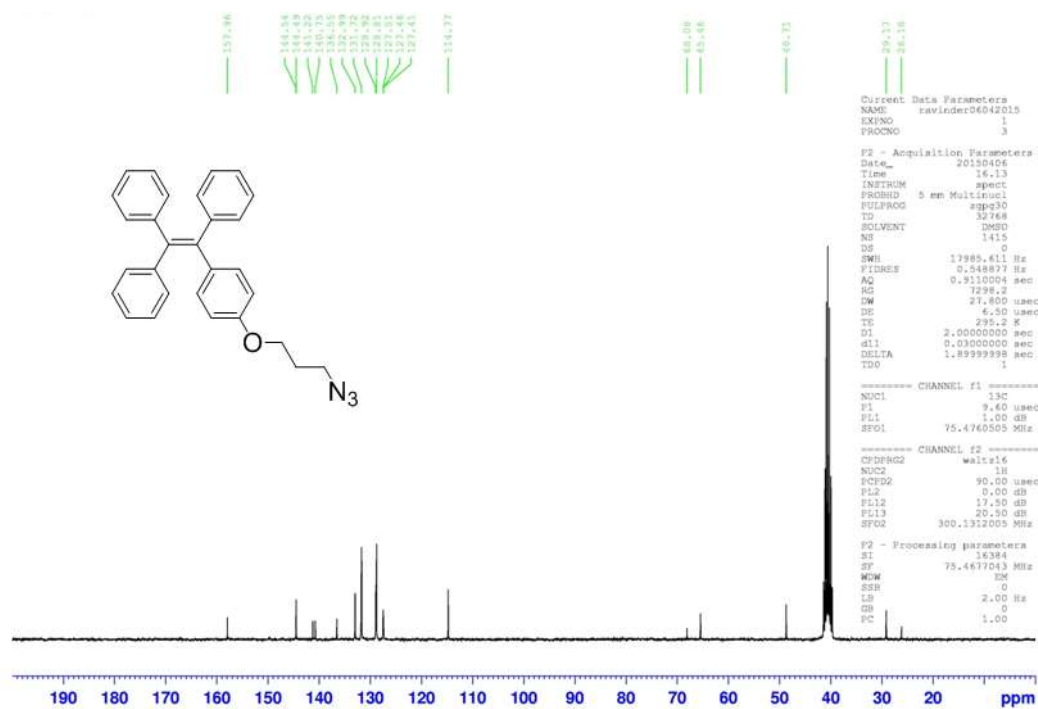

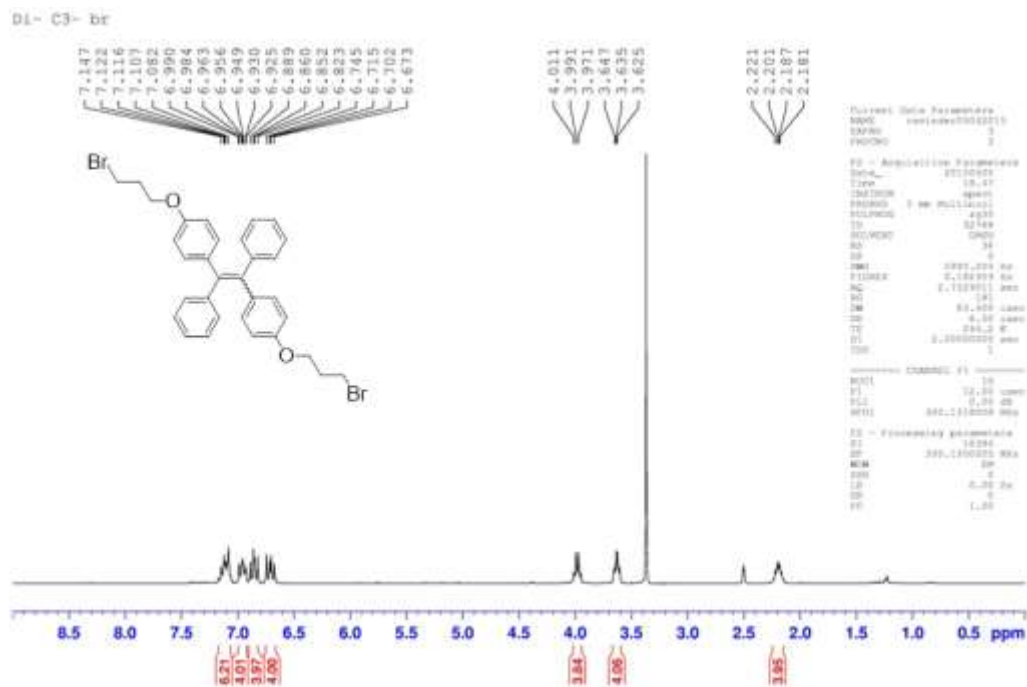

Figure S20.1.  $^1\text{H}$  NMR of intermediate (5).

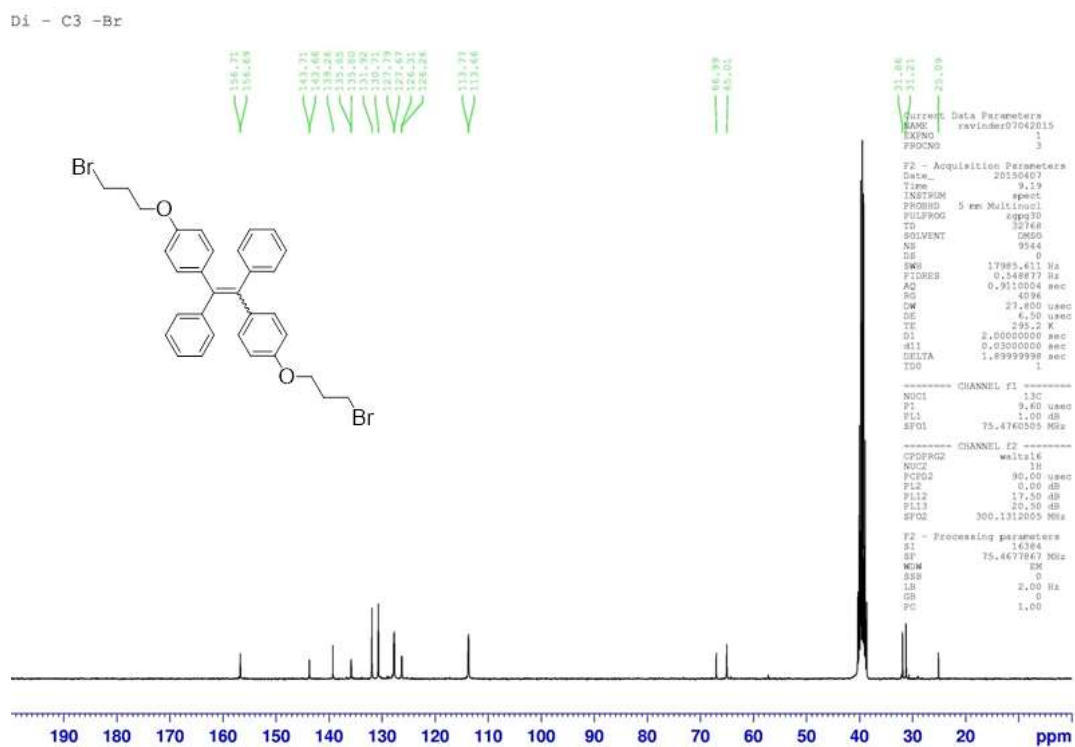

Figure S20.2.  $^{13}\text{C}$  NMR of intermediate (5).



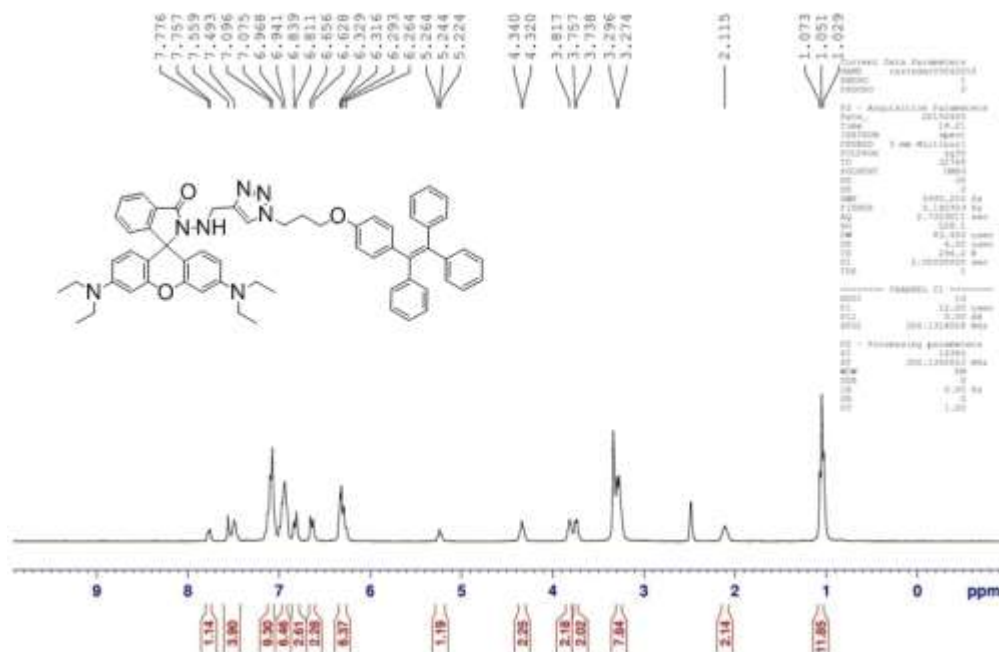

Figure S22.1. <sup>1</sup>H NMR of TR-B.

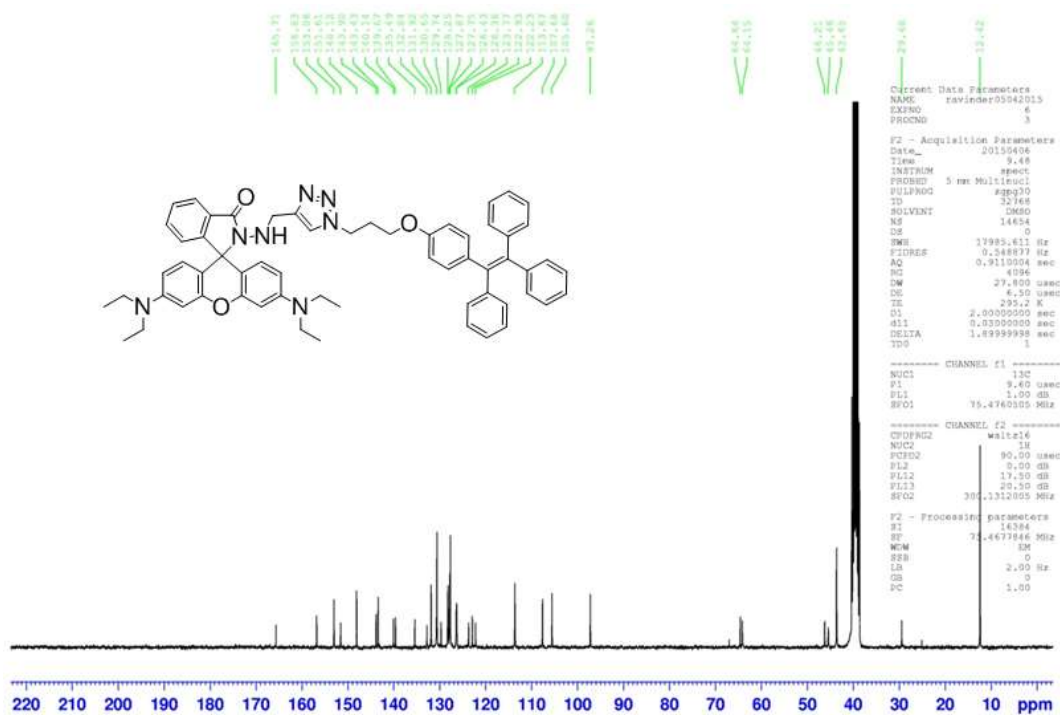

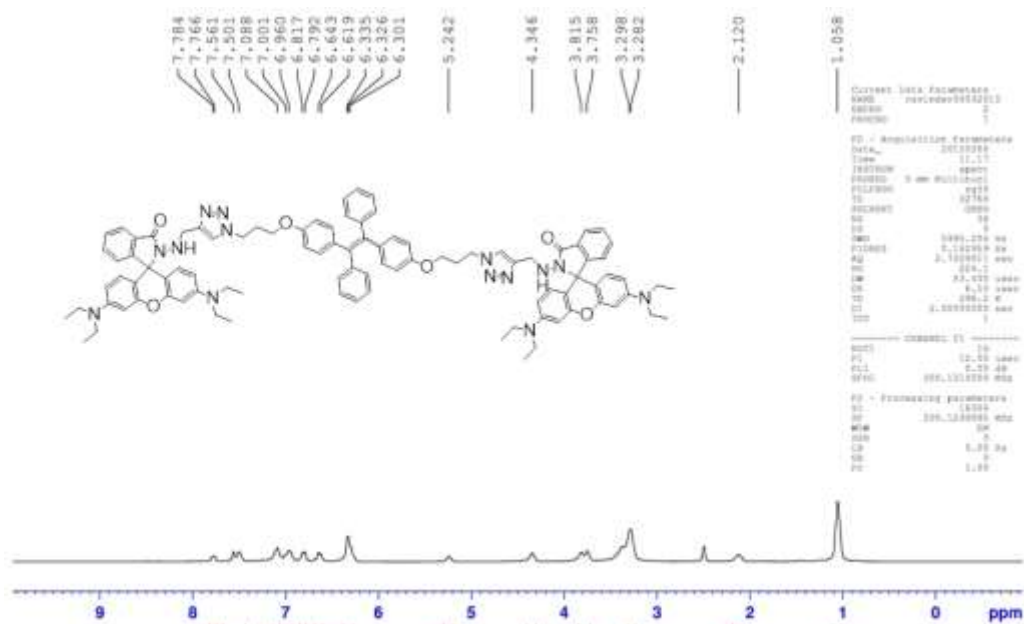

Figure S23.1.  $^1\text{H}$  NMR of TR-A.

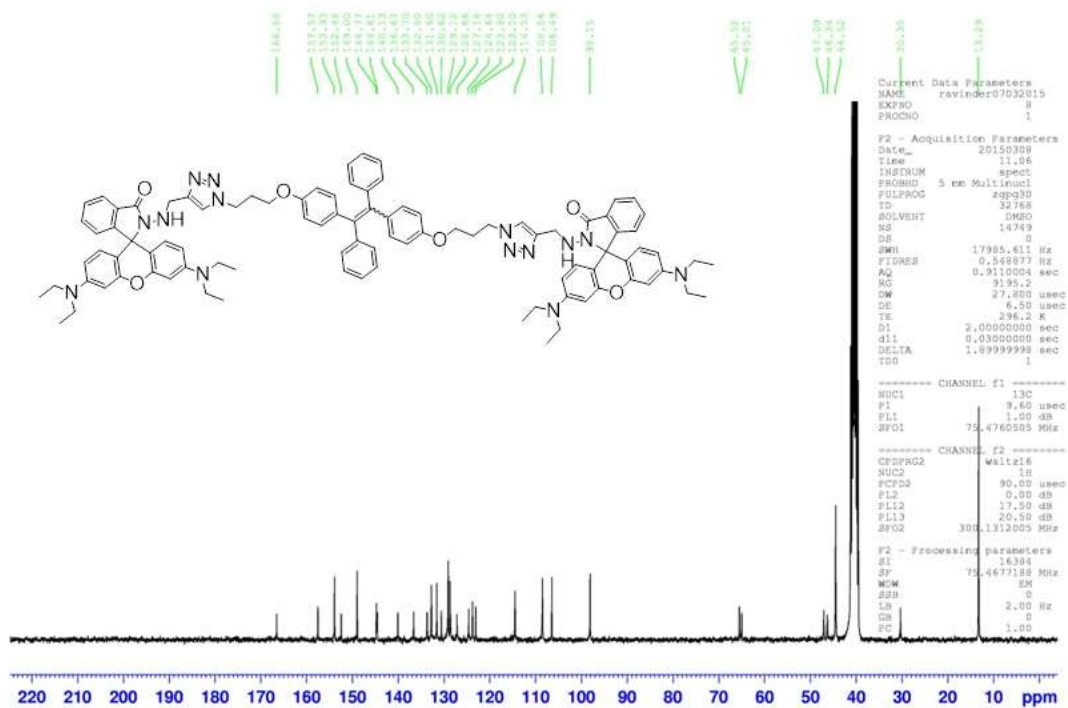

Figure S23.2.  $^{13}\text{C}$  NMR of TR-A.

Department of Applied Chemistry, National Chiao Tung University  
Elemental Analyzer Heraeus CHN-O Rapid Service Report

User Name: Ravinder Singh      Department: Prof. H.C.Lin

Received Date: 20141223      Finished Date: 20141225

Experiment:

| Sample Name: | MONO  | MONO  | DI-1ST | DI-1ST | DI-IIND | DI-IIND |  |
|--------------|-------|-------|--------|--------|---------|---------|--|
| N%           | 10.47 | 10.51 | 12.46  | 12.64  | 12.75   | 12.62   |  |
| C%           | 78.15 | 77.79 | 73.28  | 73.51  | 73.48   | 73.67   |  |
| H%           | 6.44  | 6.55  | 6.64   | 6.60   | 6.48    | 6.44    |  |

|              |  |  |  |  |  |  |  |
|--------------|--|--|--|--|--|--|--|
| Sample Name: |  |  |  |  |  |  |  |
| N%           |  |  |  |  |  |  |  |
| C%           |  |  |  |  |  |  |  |
| H%           |  |  |  |  |  |  |  |

Estimate:

| Sample Name: | MONO  | DI-1ST | DI-IIND |  |  |  |  |
|--------------|-------|--------|---------|--|--|--|--|
| N%           | 10.59 | 12.90  | 12.90   |  |  |  |  |
| C%           | 77.81 | 74.28  | 74.28   |  |  |  |  |
| H%           | 6.42  | 6.50   | 6.50    |  |  |  |  |

Standard : Acetanilide

Remarks:

Equipment Manager Signature: 謝有容      Technician Signature: 技士李藏明

**Figure S24.** Elementary analysis data of **TR-A** and **TR-B**.

## Display Report

### Analysis Info

|               |                                                                   |
|---------------|-------------------------------------------------------------------|
| Analysis Name | D:\Data\NCTU SERVICE\Data\2015\20150305\R2 927 ESI+_GB4_01_5073.d |
| Method        | MW600-3000.m                                                      |
| Sample Name   | R2 927 ESI+                                                       |
| Comment       |                                                                   |

Acquisition Date 3/5/2015 8:32:16 PM

Operator NCTU

Instrument Impact HD 1819696.00164

### Acquisition Parameter

|             |          |                      |          |                  |           |
|-------------|----------|----------------------|----------|------------------|-----------|
| Source Type | ESI      | Ion Polarity         | Positive | Set Nebulizer    | 1.0 Bar   |
| Focus       | Active   | Set Capillary        | 4500 V   | Set Dry Heater   | 200 °C    |
| Scan Begin  | 50 m/z   | Set End Plate Offset | -500 V   | Set Dry Gas      | 6.0 l/min |
| Scan End    | 3000 m/z | Set Charging Voltage | 2000 V   | Set Divert Valve | Waste     |
|             |          | Set Corona           | 0 nA     | Set APCI Heater  | 0 °C      |

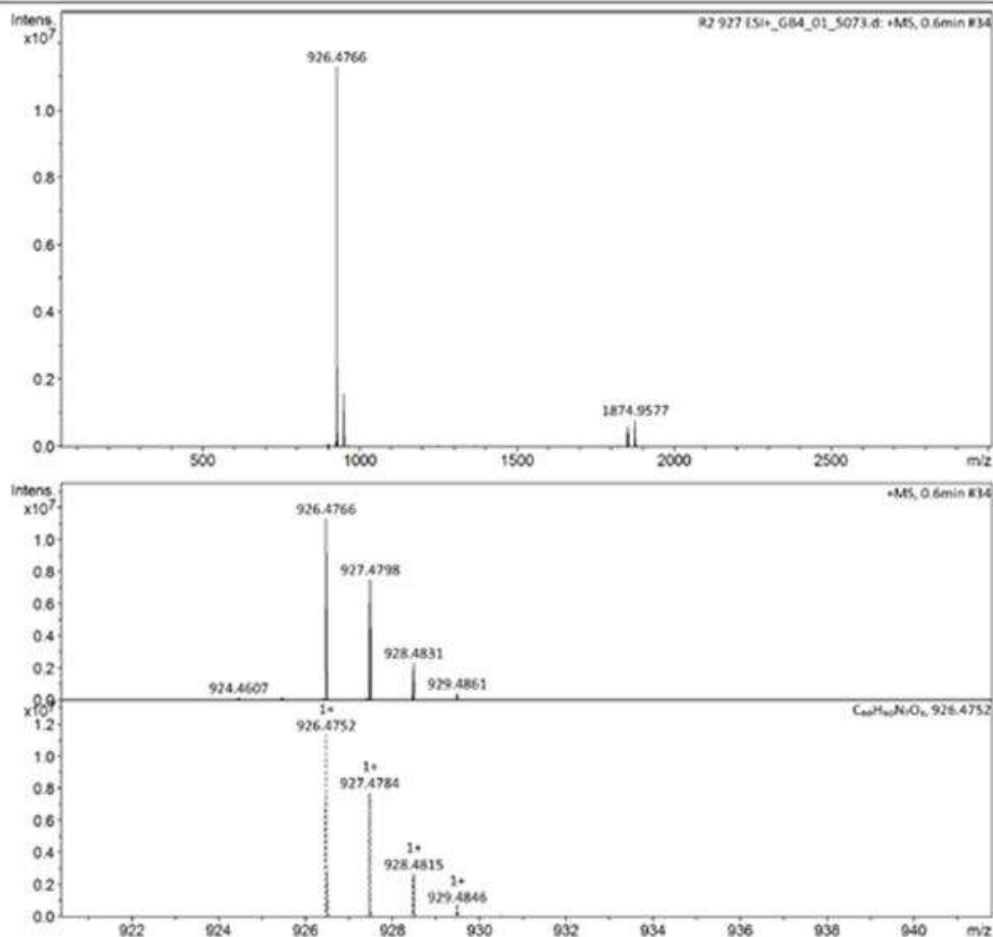

R2 927 ESI+\_GB4\_01\_5073.d

Bruker Compass DataAnalysis 4.1

printed: 3/5/2015 9:37:30 AM

by: NCTU

Page 1 of 2

## Display Report

| Meas. m/z | # | Ion Formula                                                   | m/z      | err [ppm] | mSigma | # Sigma | Score  | rdB  | e <sup>-</sup> Conf | N-Rule | Adduct |
|-----------|---|---------------------------------------------------------------|----------|-----------|--------|---------|--------|------|---------------------|--------|--------|
| 926.4766  | 1 | C <sub>60</sub> H <sub>60</sub> N <sub>7</sub> O <sub>3</sub> | 926.4752 | 1.5       | 17.4   | 1       | 100.00 | 34.5 | even                | ok     | M+H    |

**Figure S25.** HRMS (ESI) spectrum of **TR-B**.



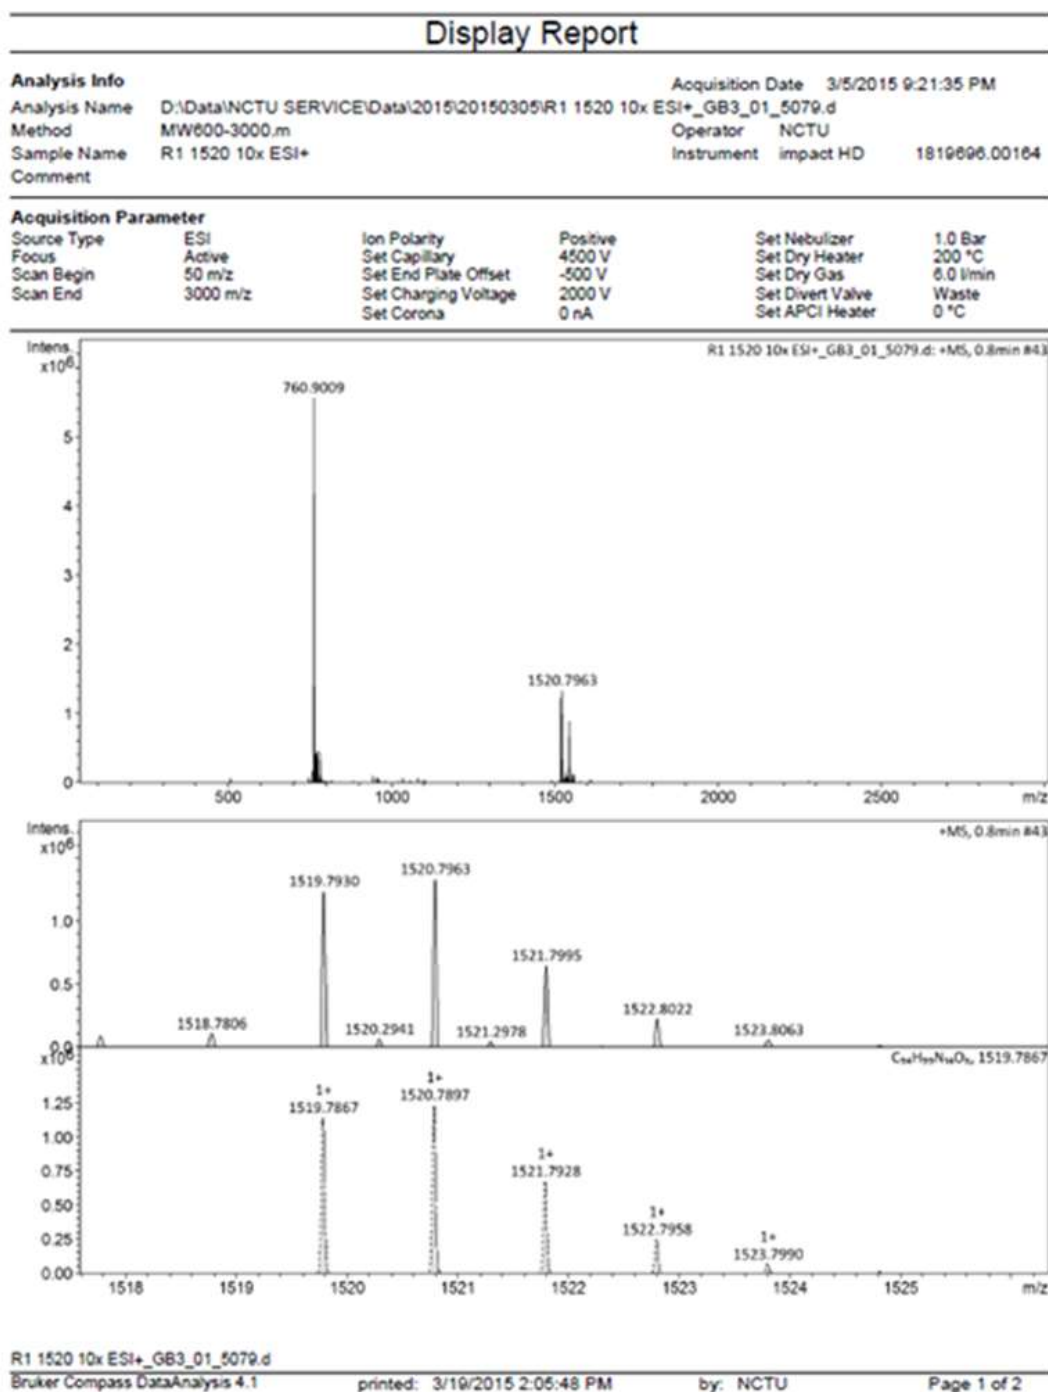

**Display Report**

| Meas. m/z | # | Ion Formula                                                    | m/z       | err [ppm] | mSigma | # Sigma | Score  | rdB  | e <sup>-</sup> Conf | N-Rule | Adduct |
|-----------|---|----------------------------------------------------------------|-----------|-----------|--------|---------|--------|------|---------------------|--------|--------|
| 1519.7930 | 1 | C <sub>94</sub> H <sub>99</sub> N <sub>14</sub> O <sub>6</sub> | 1519.7867 | -4.2      | 28.4   | 1       | 100.00 | 52.5 | even                | ok     | M+H    |

**Figure S26.** HRMS (ESI) spectrum of **TR-A**.



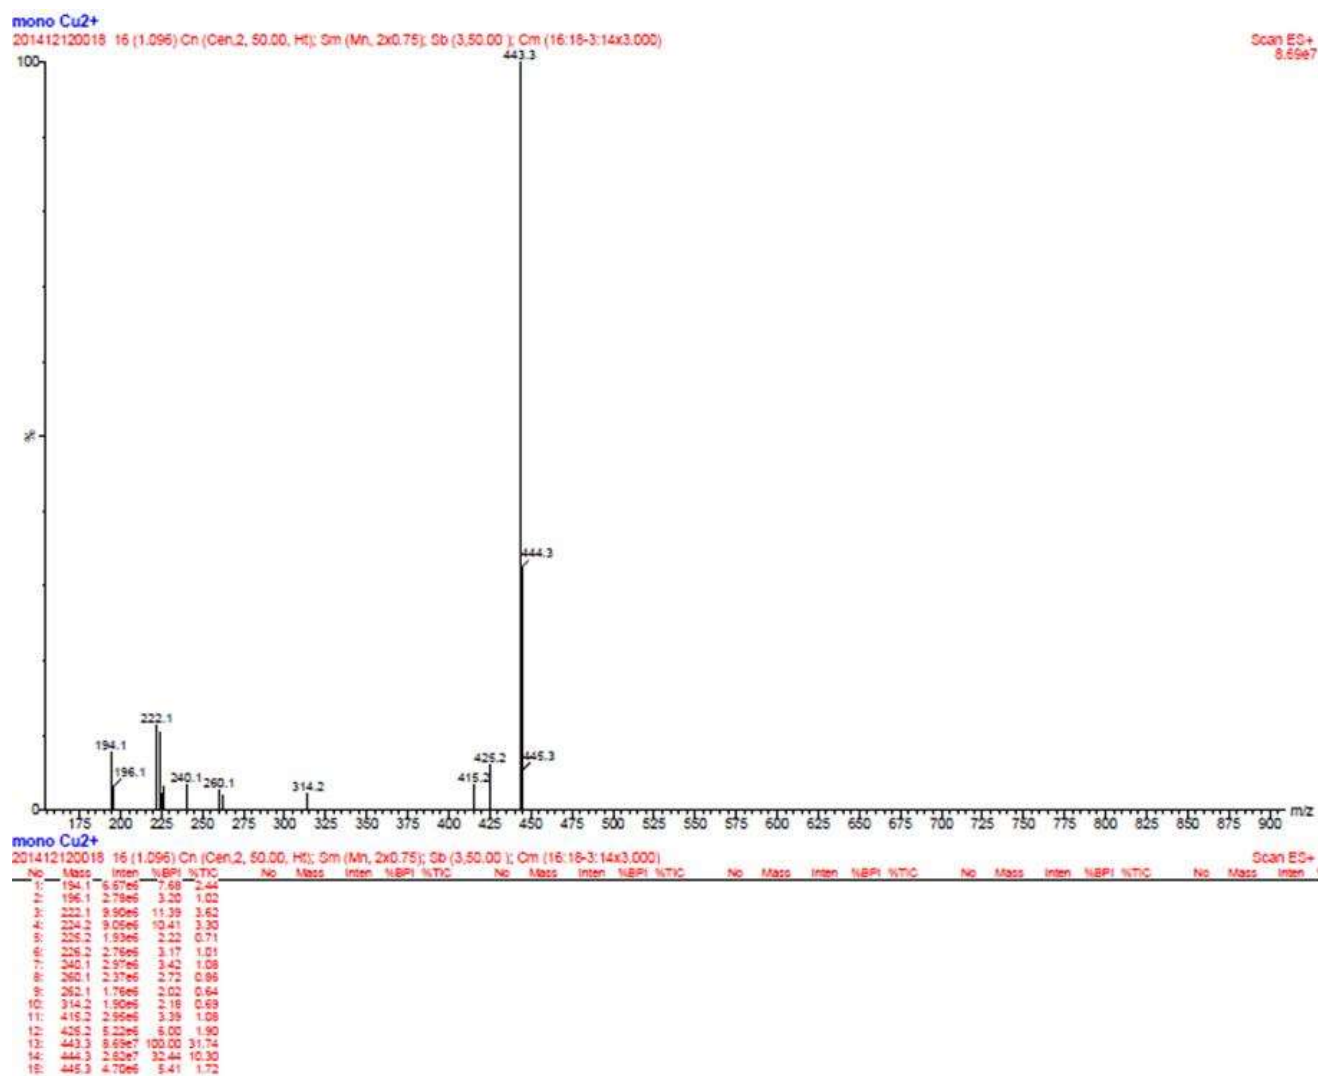

**Figure S27.** Mass spectrum of **TR-B** in the presence of  $\text{Cu}^{2+}$  metal ion.

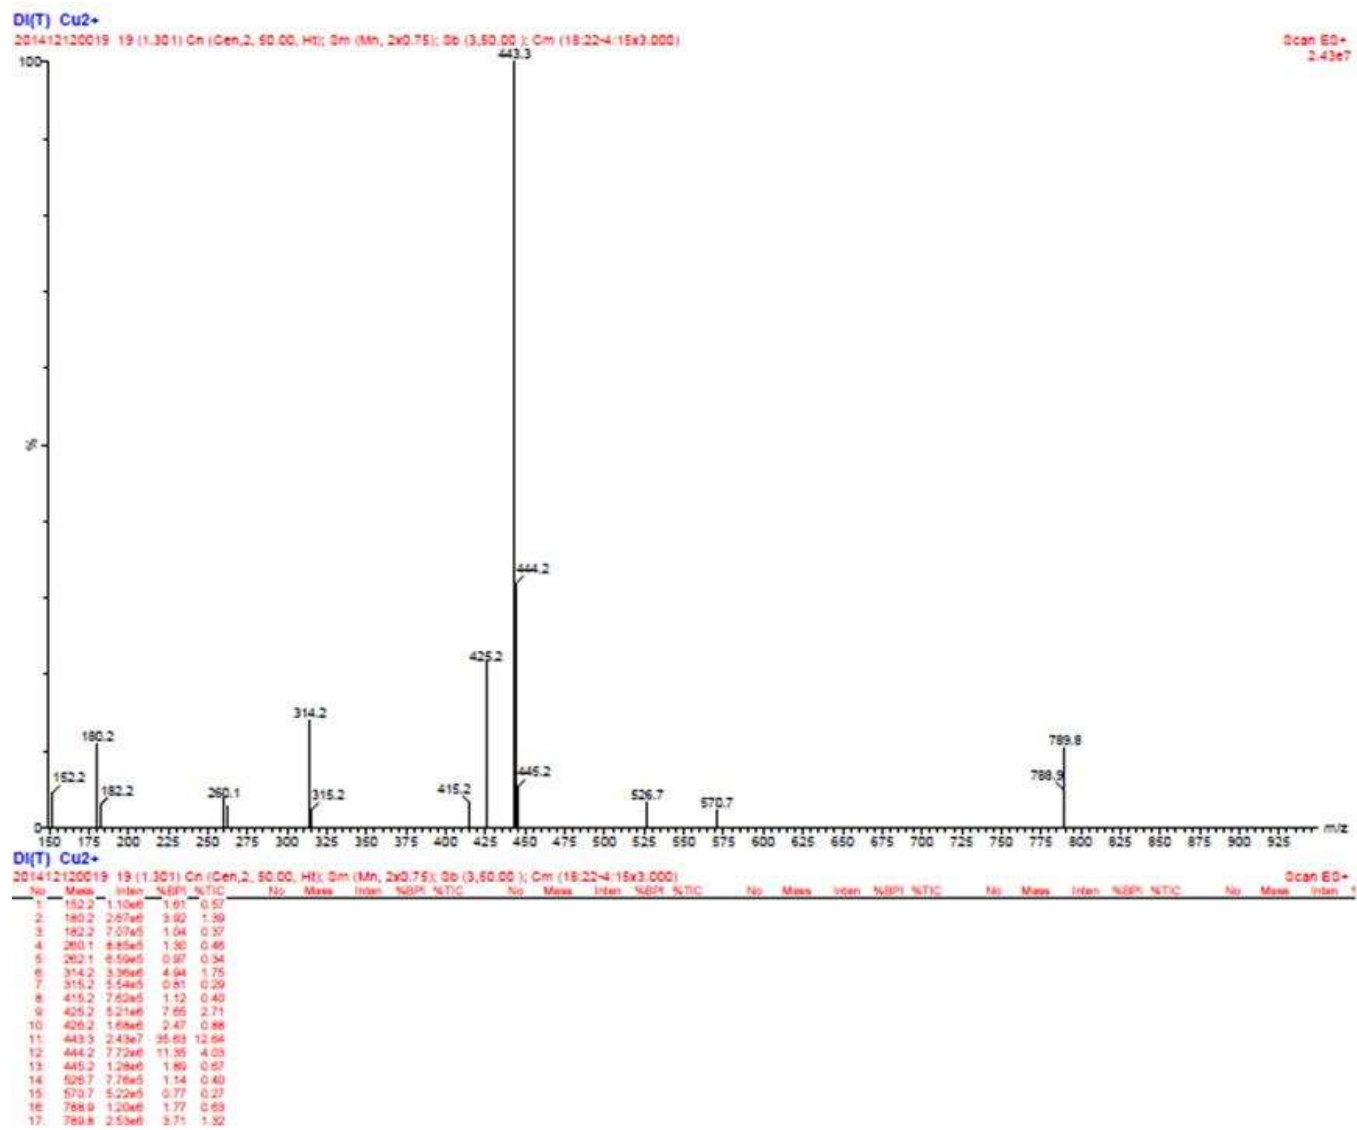

**Figure S28.** Mass spectrum of **TR-A** in the presence of  $\text{Cu}^{2+}$  metal ion.
